# Supplementary material for: Ocean Acidification Affects the Response of the Coastal Coccolithophore Pleurochrysis carterae to Irradiance
Source: MDPI journal article supplement (doi:10.3390/biology12091249), 2023-09-18

## Supporting Information.

Table S1. List of the physiological responses of coccolithophores *E. huxleyi* and *G. oceanica* under different CO<sub>2</sub> and irradiance treatments, extracted for previously published studies (Jin et al., 2017; Zhang et al., 2015).

| Strain             | Treatment                         |                                                                | Parameters                             |                                                                     |                                                                     |
|--------------------|-----------------------------------|----------------------------------------------------------------|----------------------------------------|---------------------------------------------------------------------|---------------------------------------------------------------------|
|                    | <i>p</i> CO <sub>2</sub><br>(ppm) | Irradiance<br>(μmol photons m <sup>-2</sup> ·s <sup>-1</sup> ) | μ <sub>max</sub><br>(d <sup>-1</sup> ) | POC Prod <sub>max</sub><br>(pg cell <sup>-1</sup> d <sup>-1</sup> ) | PIC Prod <sub>max</sub><br>(pg cell <sup>-1</sup> d <sup>-1</sup> ) |
| <i>E. huxleyi</i>  | ~ 400                             | 54                                                             | 0.60                                   | 8.50                                                                | 5.10                                                                |
|                    |                                   | 83                                                             | 0.65                                   | 10.50                                                               | 5.00                                                                |
|                    |                                   | 141                                                            | 0.64                                   | 10.20                                                               | 5.40                                                                |
|                    |                                   | 257                                                            | 0.68                                   | 12.30                                                               | 5.90                                                                |
|                    |                                   | 456                                                            | 0.57                                   | 10.70                                                               | 3.10                                                                |
|                    | ~ 1000                            | 54                                                             | 0.59                                   | 10.00                                                               | 2.00                                                                |
|                    |                                   | 83                                                             | 0.72                                   | 11.30                                                               | 3.00                                                                |
|                    |                                   | 141                                                            | 0.77                                   | 12.40                                                               | 4.00                                                                |
|                    |                                   | 257                                                            | 0.8                                    | 13.80                                                               | 4.10                                                                |
|                    |                                   | 456                                                            | 0.85                                   | 18.00                                                               | 3.20                                                                |
|                    | ~ 500                             | 50                                                             | 0.5                                    | 4.09                                                                | 5.340                                                               |
|                    |                                   | 100                                                            | 0.72                                   | 12.27                                                               | 17.14                                                               |
|                    |                                   | 200                                                            | 1.09                                   | 21.27                                                               | 36.84                                                               |
|                    |                                   | 400                                                            | 1.19                                   | 40.28                                                               | 55.43                                                               |
| <i>G. oceanica</i> |                                   | 600                                                            | 1.21                                   | 39.43                                                               | 63.75                                                               |
|                    |                                   | 800                                                            | 1.26                                   | 37.13                                                               | 61.46                                                               |
|                    | ~ 1000                            | 50                                                             | 0.52                                   | 3.68                                                                | 3.62                                                                |
|                    |                                   | 100                                                            | 0.78                                   | 13.92                                                               | 13.47                                                               |
|                    |                                   | 200                                                            | 0.9                                    | 23.24                                                               | 17.27                                                               |
|                    |                                   | 400                                                            | 0.95                                   | 27.23                                                               | 17.77                                                               |
|                    |                                   | 600                                                            | 0.89                                   | 18.83                                                               | 20.78                                                               |
|                    |                                   | 800                                                            | 0.88                                   | 17.50                                                               | 20.55                                                               |

Data extracted from Jin et.al (2017) for *E. huxleyi* and from Zhang et.al (2015) for *G. oceanica*. All data are mean values of parallel samples. *E. huxleyi* was maintained in artificial seawater enriched with Aquil medium at 20°C. *G. oceanica* was grown in artificial seawater (ASW) at 20°C with a 16: 8 h light: dark photo-period in a RUMED Light Thermostat.

Figure S1: Comparison of the effects of OA and irradiance on the physiology of coccolithophores *P. carterae*, *E. huxleyi* and *G. oceanica*. (A) Growth rate vs. irradiance; (B) POC production rate vs. irradiance; (C) PIC production rate vs. irradiance. The growth rate vs. irradiance curves was fitted using a model of Eilers and Peters (1988). The POC and PIC production rate vs. irradiance curves (P-I curves) were fitted to the Steele model (1962), while the POC production rate vs. irradiance curves of *E. huxleyi* was fitted to the model of Eilers and Peters (1988).

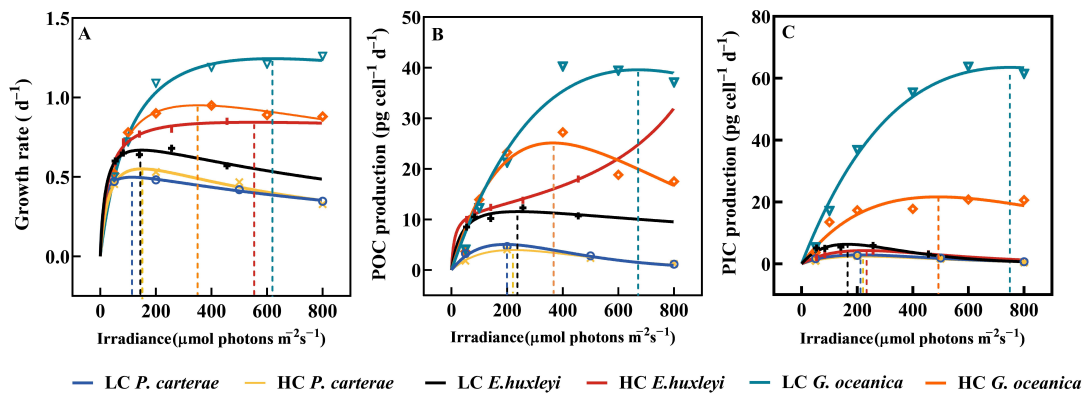

Data extracted from Jin et.al (2017) for *E. huxleyi* and from Zhang et.al (2015) for *G. oceanica*. (LC means low CO<sub>2</sub> concentration, HC means high CO<sub>2</sub> concentration.)

Figure S2. The box plot of cell sizes of the coccolithophore of *P. carterae* under different CO<sub>2</sub> and irradiance treatments. Center lines show the medians, box limits indicate the 5th and 75th percentiles and outliers are represented by dots. (LC means low CO<sub>2</sub> concentration, HC means high CO<sub>2</sub> concentration.)

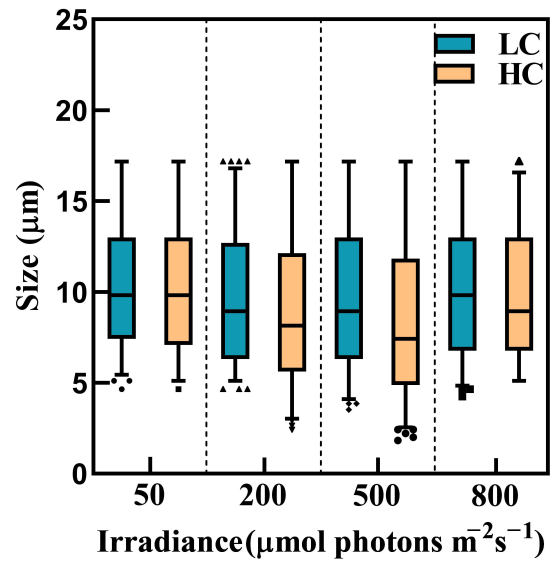

Supplement: s1 [file s1]
