# Supplementary material for: Ocean Acidification Affects the Response of the Coastal Coccolithophore Pleurochrysis carterae to Irradiance
Source: Biology (Basel). 2023 Sep 18;12(9):1249. doi: 10.3390/biology12091249 (PMC10525560; doi:10.3390/biology12091249)
Supplement: Supplementary file 1 [file biology-12-01249-s001.zip › Date.xlsx]

## Sheet: Sheet1
	μ ( d−1)	POC production rate (pg cell−1 d−1)	PIC production rate(pg cell−1 d−1)	Chl.-a (pg cell−1)	POC (pg cell−1 )	PIC(pg cell−1 )	PON(pg cell−1 )	POP(pg cell−1 )	C:N	C:P	N:P
50 μmol photons m−2·s−1+400 ppm	0.471029	3.27413	1.63623	1.16038	6.9567	3.48304	2.63021	0.16045	2.73939	43.6783	17.3065
200 μmol photons m−2·s−1+400 ppm	0.481838	4.67546	2.70067	1.42579	9.7177	5.58753	2.69437	0.255702	3.61265	37.9535	10.5527
500 μmol photons m−2·s−1+400 ppm	0.419754	2.82034	1.85958	0.617727	6.70345	4.4222	1.79518	0.100649	4.10968	66.7798	18.0828
800 μmol photons m−2·s−1+400 ppm	0.346563	1.16561	0.647775	0.339263	3.33897	1.91379	0.786166	0.0709554	4.26068	46.9649	11.0688
50 μmol photons m−2·s−1+800 ppm	0.454931	1.82958	0.966068	1.35172	4.03517	2.12319	1.87158	0.23625	2.15102	17.1244	7.9273
200 μmol photons m−2·s−1+800 ppm	0.530905	4.06518	2.60764	1.43433	7.91419	4.45134	2.57925	0.247995	3.34711	39.7047	10.8064
500 μmol photons m−2·s−1+800 ppm	0.46718	2.37153	1.6716	0.713054	5.07274	3.63625	1.5642	0.143774	3.31919	35.8122	10.9572
800 μmol photons m−2·s−1+800 ppm	0.32776	1.23717	0.449708	0.358869	3.80434	1.33745	0.637404	0.0753739	6.04151	50.2478	8.48394
	Inhibition of growth rate(%)	Inhibition of POC production rate(%)	Inhibition of PIC production rate(%)
50 μmol photons m−2·s−1	-3.41667	-44.12	-40.9567
200 μmol photons m−2·s−1	10.1833	-19.205	-15.615
500 μmol photons m−2·s−1	11.3	-15.9133	-25.535
800 μmol photons m−2·s−1	-5.42667	-5.875	-60.835
	Ik of growth rate (μmol photons m−2s−1)	Ik of POC production rate(μmol photons m−2s−1)	Ik of PIC production rate(μmol photons m−2s−1)	μmax ( d−1)	POC Production ratemax (pg cell-1 d-1)	PIC Production ratemax (pg cell-1 d-1)
400 ppm	103.333	193.667	213	0.49858	5.1	2.864
800 ppm	151.333	227.667	221.667	0.551935	3.83667	2.50067
